# Supplementary material for: Long-term nutrient fertilization and the carbon balance of permanentgrassland: any evidence for sustainable intensification?
Source: Copernicus journal article supplement (doi:10.5194/bg-13-4975-2016), 2016-09-09
Supplement: Supplementary file 1 [file bg-13-4975-2016-supplement.pdf]

Supplement of Biogeosciences, 13, 4975–4984, 2016  
<http://www.biogeosciences.net/13/4975/2016/>  
doi:10.5194/bg-13-4975-2016-supplement  
© Author(s) 2016. CC Attribution 3.0 License.

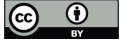

*Supplement of*

## **Long-term nutrient fertilization and the carbon balance of permanent grassland: any evidence for sustainable intensification?**

**Dario A. Fornara et al.**

*Correspondence to:* Dario A. Fornara (dario.fornara@afbini.gov.uk)

The copyright of individual parts of the supplement might differ from the CC-BY 3.0 licence.

## Supplementary Material

5 **Fig. 1.** Design of the Long-Term Slurry (LTS) experiment established at Hillsborough (UK) in 1970. There are six replicates for each of eight different nutrient applications giving 48 experimental plots arranged in a randomized block design.

| BLOCK 3    |            | BLOCK 2    |            | BLOCK 1    |            |
|------------|------------|------------|------------|------------|------------|
| PIG 100    | NPK        | PIG 100    | PIG 50     | NPK        | CATTLE 100 |
| PIG 200    | PIG 100    | PIG 200    | CATTLE 50  | PIG 50     | CATTLE 50  |
| CTRL       | PIG 200    | CTRL       | CATTLE 100 | CTRL       | PIG 100    |
| CATTLE 50  | CATTLE 100 | PIG 100    | CATTLE 200 | CATTLE 200 | NPK        |
| CTRL       | CATTLE 100 | NPK        | CATTLE 50  | CATTLE 50  | CTRL       |
| CATTLE 200 | CATTLE 50  | CTRL       | PIG 50     | PIG 100    | PIG 200    |
| PIG 50     | PIG 50     | NPK        | CATTLE 100 | CATTLE 200 | CATTLE 100 |
| NPK        | CATTLE 200 | CATTLE 200 | PIG 200    | PIG 200    | PIG 50     |

  

|                                                                                                                       |                                                                                                                                                                                                                                                                                                                                                                                                                 |
|-----------------------------------------------------------------------------------------------------------------------|-----------------------------------------------------------------------------------------------------------------------------------------------------------------------------------------------------------------------------------------------------------------------------------------------------------------------------------------------------------------------------------------------------------------|
| <p>8 treatments<br/>6 replicates each<br/>48 plots in randomized block design<br/>Plot size = 29.75 m<sup>2</sup></p> | <p><b>CTRL</b> = Control (unfertilized)<br/> <b>NPK</b> = 200 kg N ha<sup>-1</sup> yr<sup>-1</sup>, 32 kg P ha<sup>-1</sup> yr<sup>-1</sup>, 160 kg K ha<sup>-1</sup> yr<sup>-1</sup><br/> <b>PIG 50, 100, 200</b> = Pig slurry at 50, 100, 200 m<sup>3</sup> ha<sup>-1</sup> yr<sup>-1</sup><br/> <b>CATTLE 50, 100, 200</b> = Cattle slurry at 50, 100, 200 m<sup>3</sup> ha<sup>-1</sup> yr<sup>-1</sup></p> |
|-----------------------------------------------------------------------------------------------------------------------|-----------------------------------------------------------------------------------------------------------------------------------------------------------------------------------------------------------------------------------------------------------------------------------------------------------------------------------------------------------------------------------------------------------------|

10

15

**Fig. 2.** Changes in soil N stocks from 1970 to 2013 (0-15 cm soil depth) under either organic or inorganic nutrient additions or no-nutrients (i.e. control). Nutrient application rates: NPK = 200 kg N, 32 kg P, 160 kg K ha<sup>-1</sup> yr<sup>-1</sup>; Pig (L), Pig (M) and Pig (H) = Pig slurry applications at 50 (Low), 100 (Medium) and 200 (High) m<sup>3</sup> ha<sup>-1</sup> yr<sup>-1</sup>, respectively; Cattle (L), Cattle (M), Cattle (H) = Cattle slurry applications at 50 (Low), 100 (Medium) and 200 (High) m<sup>3</sup> ha<sup>-1</sup> yr<sup>-1</sup> respectively. Best fit lines (dashed lines): Cattle (H) ( $y = 0.084x - 161$ ;  $R^2 = 0.98$ ); Cattle (M) ( $y = 0.053x - 100$ ;  $R^2 = 0.87$ ); Cattle (L) ( $y = 0.032x - 58.418$ ;  $R^2 = 0.88$ ); Pig (H) ( $y = 70.1 \cdot \ln(x) - 526$ ;  $R^2 = 0.66$ ); Pig (M) ( $y = 0.023x - 39.5$ ;  $R^2 = 0.57$ ); Pig (L) ( $y = 0.025x - 44.23$ ;  $R^2 = 0.81$ ); NPK ( $y = 0.022x - 37.6$ ;  $R^2 = 0.74$ ); Control ( $y = 0.014x - 21.8$ ;  $R^2 = 0.60$ ).

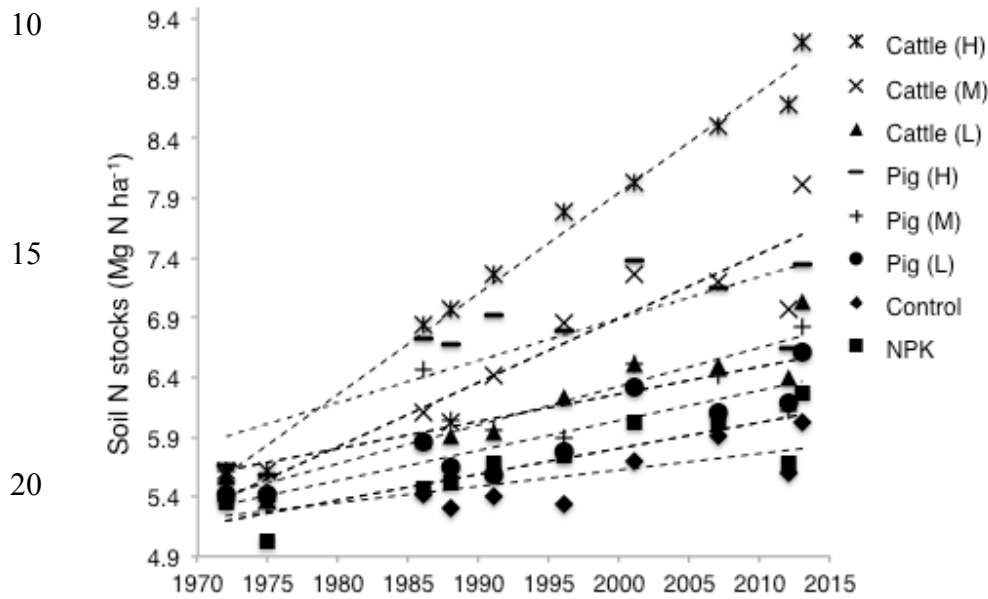

**Fig. 3.** Relationship between net soil N sequestration rates (Mg N ha<sup>-1</sup> yr<sup>-1</sup>; 0-15 cm depth) and nutrient application treatments. Nutrient application rates as for Supplementary Fig. 2. Standard errors indicate variation among six replicate values for each treatment.

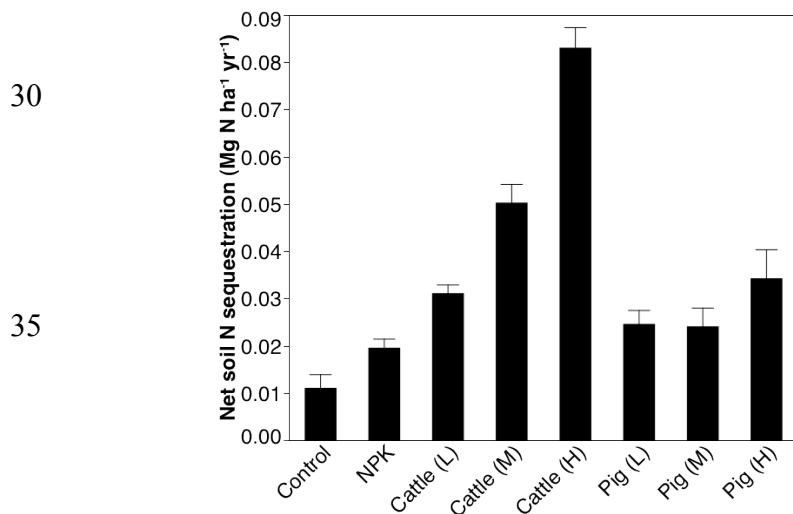

**Fig. 4.** Relationship between mean soil N (%) content at three soil depths (A=0-5 cm; B=5-10 cm; C=10-15 cm) and different nutrient treatments. Nutrient application rates as for Supplementary Fig. 2. Standard errors indicate variation among six replicate values for each treatment.

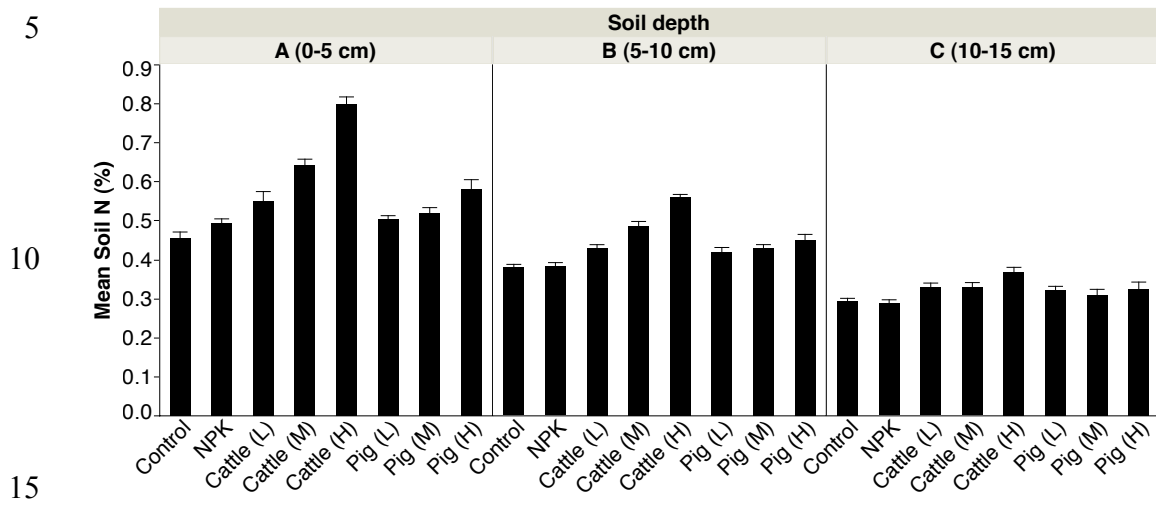

**Fig. 5.** Relationship between soil C stocks ( $\text{Mg C ha}^{-1}$ ) in the 15-30 cm depth layer and nutrient application treatments. Soil stocks between 15-30 cm depth were measured in 1998 and 2013. Note that in 1998 the control treatment plots were not sampled. Nutrient application rates as for Supplementary Fig. 2. Standard errors indicate variation among six replicate values for each treatment.

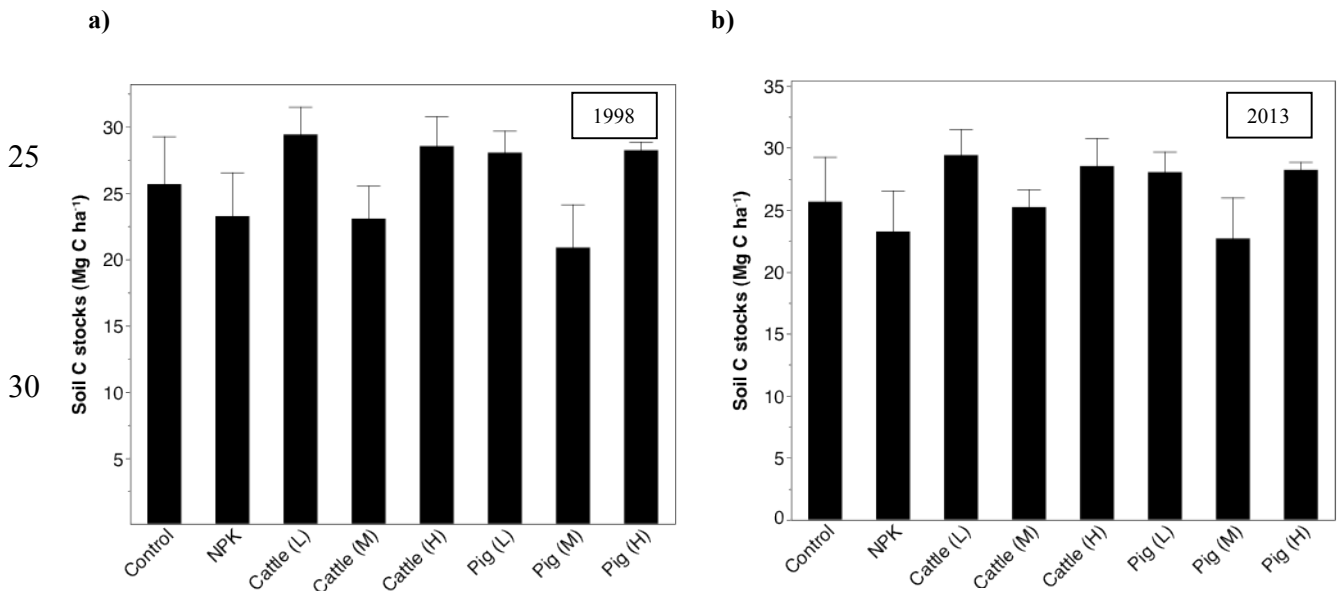

35

40

### Global Warming Potential (GWP) calculations

To estimate the long-term net C balance of our permanent grassland we calculated the Global Warming Potential (GWP) associated with each experimental nutrient treatment (Robertson et al., 2000; Fornara et al., 2011). Net changes in soil CO<sub>2</sub> sequestration were calculated between 1970 and 2013 in the 0-15 cm soil depth layer. We are aware that *IPCC Guidelines* define soil carbon stocks as organic carbon incorporated into mineral soil horizons to a depth of 30 cm. In our study, we have measured soil C stocks between 15 and 30 cm depth in 1998 and 2013 (see Supplementary Fig. 5); we did not find, however, any significant difference in C stocks between nutrient treatments. We observed significant changes in soil C content and stocks only in the 0-15 cm soil depth and we thus used these rates of soil C sequestration in our GWP calculations. All GHG emissions associated with the management of our permanent grassland were calculated using information from IPCC reports (Dong et al., 2006; De Klein et al., 2006; Myhre et al., 2013) and from multiple peer-reviewed scientific papers. GHG emissions were converted to CO<sub>2</sub> equivalents (CO<sub>2</sub>-eq) assuming a 100 year time horizon (Myhre et al., 2013). To simulate grassland management intensification we assumed a cattle-stocking rate of 2 animals (i.e. livestock units) per hectare.

15

#### 1) Liming contribution to GWP through soil CO<sub>2</sub> emissions.

| Nutrient treatments | CaCO <sub>3</sub> applications<br>(Mg ha <sup>-1</sup> yr <sup>-1</sup> ) | Total<br>emissions<br>(Mg ha <sup>-1</sup> ) * | CO <sub>2</sub><br>emissions<br>(g m <sup>-2</sup> y <sup>-1</sup> ) | Total CO <sub>2</sub><br>emissions<br>(g m <sup>-2</sup> y <sup>-1</sup> ) |
|---------------------|---------------------------------------------------------------------------|------------------------------------------------|----------------------------------------------------------------------|----------------------------------------------------------------------------|
| Control             | 0.07                                                                      | 0.031                                          | 3.1                                                                  |                                                                            |
| NPK                 | 0.09                                                                      | 0.04                                           | 4                                                                    |                                                                            |
| Cattle (L)          | 0.04                                                                      | 0.018                                          | 1.8                                                                  |                                                                            |
| Cattle (M)          | 0.006                                                                     | 0.003                                          | 0.3                                                                  |                                                                            |
| Cattle (H)          | 0.0001                                                                    | 0.0003                                         | 0.03                                                                 | 25                                                                         |

\* All C in CaCO<sub>3</sub> is emitted in the atmosphere as CO<sub>2</sub> thus keeping in mind atomic weights of C (12), O (16) and Ca (40) this means that 1 tonne of CaCO<sub>3</sub> applied releases 0.44 tonnes of CO<sub>2</sub>.

#### 30 2) Liming contribution to GWP due to the production and transport of lime.

| Nutrient treatments | Total<br>applications<br>(Mg ha <sup>-1</sup> ) | CaCO <sub>3</sub> | Total CO <sub>2</sub> emissions<br>(Mg ha <sup>-1</sup> ) due to lime<br>production & transport | Total CO <sub>2</sub> emissions<br>(g m <sup>-2</sup> y <sup>-1</sup> ) due to lime<br>production & transport |
|---------------------|-------------------------------------------------|-------------------|-------------------------------------------------------------------------------------------------|---------------------------------------------------------------------------------------------------------------|
| Control             | 0.07                                            |                   | 0.0025                                                                                          | 0.25                                                                                                          |
| NPK                 | 0.09                                            |                   | 0.0032                                                                                          | 0.3                                                                                                           |
| Cattle (L)          | 0.04                                            |                   | 0.0014                                                                                          | 0.1                                                                                                           |
| Cattle (M)          | 0.006                                           |                   | 0.0002                                                                                          | 0.02                                                                                                          |
| Cattle (H)          | 0.0001                                          |                   | 0.00002                                                                                         | 0.002                                                                                                         |

Previous studies (West and Marland, 2002; West and McBride, 2005) estimate that production of crushed limestone and transport to site of application (on an average distance of 160 km) is responsible for emissions of about 0.036 tonnes of CO<sub>2</sub> per tonne of limestone.

5 3) CO<sub>2</sub>-eq emissions from the enteric fermentation of ruminant livestock

CO<sub>2</sub> emissions from enteric fermentation were estimated using emission factors given for Western Europe (Dong et al. 2006). These emission factors are comparable to those determined from local studies under Irish grassland conditions (Casey and Holden, 2005; Yan et al., 2010). We used 117 for dairy cattle and 57 for beef (meat) cattle.

10

| TIER I ENTERIC FERMENTATION EMISSION FACTORS FOR CATTLE                                                                                                                                                                                                                                              |                 |                                                                           |                                                                                |
|------------------------------------------------------------------------------------------------------------------------------------------------------------------------------------------------------------------------------------------------------------------------------------------------------|-----------------|---------------------------------------------------------------------------|--------------------------------------------------------------------------------|
| Regional characteristics                                                                                                                                                                                                                                                                             | Cattle category | Emission factor (kg CH <sub>4</sub> head <sup>-1</sup> yr <sup>-1</sup> ) | Comments                                                                       |
| <b>North America:</b> Highly productive commercialized dairy sector feeding high quality forage and grain. Separate beef cow herd, primarily grazing with feed supplements seasonally. Fast-growing beef steers/heifers finished in feedlots on grain. Dairy cows are a small part of the population | Dairy           | 128                                                                       | Average milk production of 8,400 kg head <sup>-1</sup> yr <sup>-1</sup> .      |
|                                                                                                                                                                                                                                                                                                      | Other Cattle    | 53                                                                        | Includes beef cows, bulls, calves, growing steers/heifers, and feedlot cattle. |
| <b>Western Europe:</b> Highly productive commercialized dairy sector feeding high quality forage and grain. Dairy cows also used for beef calf production. Very small dedicated beef cow herd. Minor amount of feedlot feeding with grains.                                                          | Dairy           | 117                                                                       | Average milk production of 6,000 kg head <sup>-1</sup> yr <sup>-1</sup> .      |
|                                                                                                                                                                                                                                                                                                      | Other Cattle    | 57                                                                        | Includes bulls, calves and growing steers/heifers.                             |
| <b>Eastern Europe:</b> Commercialised dairy sector feeding mostly forages. Separate beef cow herd, primarily grazing. Minor amount of feedlot feeding with grains.                                                                                                                                   | Dairy           | 99                                                                        | Average milk production of 2,550 kg head <sup>-1</sup> yr <sup>-1</sup> .      |
|                                                                                                                                                                                                                                                                                                      | Other Cattle    | 58                                                                        | Includes beef cows, bulls and young                                            |

CH<sub>4</sub> emissions were converted to CO<sub>2</sub> equivalents using the following equation:

$$Y_g \text{ CO}_2 \cdot m \cdot y = y_g \text{ CH}_4 - \text{Cha} \cdot d \times 16 \text{ g CH}_2\text{8 g CH}_4 - C \times 365 \text{ d} \cdot y \times 1 \text{ ha} \cdot 10 \text{ m} \times 28 \text{ g CO}_2 \text{ g CH}_4$$

15

20

| Nutrient treatments | Enteric fermentation emissions<br>(g CH <sub>4</sub> m <sup>-2</sup> y <sup>-1</sup> ) | Enteric fermentation emissions<br>(g CO <sub>2</sub> -eq m <sup>-2</sup> y <sup>-1</sup> ) |
|---------------------|----------------------------------------------------------------------------------------|--------------------------------------------------------------------------------------------|
| Control             | 0                                                                                      | 0                                                                                          |
| NPK                 | 0                                                                                      | 0                                                                                          |
| <b>Meat</b>         |                                                                                        | 5                                                                                          |
| Cattle (L)          | 68400                                                                                  | 109.4                                                                                      |
| Cattle (M)          | 68400                                                                                  | 109.4                                                                                      |
| Cattle (H)          | 68400                                                                                  | 109.4                                                                                      |
| <b>Dairy</b>        |                                                                                        | 10                                                                                         |
| Cattle (L)          | 140400                                                                                 | 224.6                                                                                      |
| Cattle (M)          | 140400                                                                                 | 224.6                                                                                      |
| Cattle (H)          | 140400                                                                                 | 224.6                                                                                      |

15

#### 4) CO<sub>2</sub>-eq emissions from manure management (CH<sub>4</sub>)

20 Emissions for CH<sub>4</sub> from organic manure management were calculated from (Dong et al., 2006) emission factors for Western Europe, with average annual temperatures of ≤10°C (see Table below). We used 21 for dairy cattle and 6 for beef (i.e. meat) cattle.

| MANURE MANAGEMENT METHANE EMISSION FACTORS BY TEMPERATURE FOR CATTLE, SWINE AND BUFFALO (KG CH <sub>4</sub> HEAD <sup>-1</sup> YR <sup>-1</sup> )                                   |                   |                                                                     |    |    |
|-------------------------------------------------------------------------------------------------------------------------------------------------------------------------------------|-------------------|---------------------------------------------------------------------|----|----|
| Regional Characteristics                                                                                                                                                            | Livestock species | CH <sub>4</sub> emission factors by average annual temperature (°C) |    |    |
|                                                                                                                                                                                     |                   | Cool                                                                |    |    |
|                                                                                                                                                                                     |                   | ≤ 10                                                                | 11 | 12 |
| <b>North America:</b> Liquid-based systems are commonly used for dairy cows and swine manure. Other cattle manure is usually managed as a solid and deposited on pastures or ranges | Dairy Cows        | 48                                                                  | 50 | 53 |
|                                                                                                                                                                                     | Other Cattle      | 1                                                                   | 1  | 1  |
|                                                                                                                                                                                     | Market Swine      | 10                                                                  | 11 | 11 |
|                                                                                                                                                                                     | Breeding Swine    | 19                                                                  | 20 | 21 |
| <b>Western Europe:</b> Liquid/slurry and pit storage systems are commonly used for cattle and swine manure. Limited cropland is available for spreading manure.                     | Dairy Cows        | 21                                                                  | 23 | 25 |
|                                                                                                                                                                                     | Other Cattle      | 6                                                                   | 7  | 7  |
|                                                                                                                                                                                     | Market Swine      | 6                                                                   | 6  | 7  |
|                                                                                                                                                                                     | Breeding Swine    | 9                                                                   | 10 | 10 |

#### 5) CO<sub>2</sub>-eq emissions from manure management (N<sub>2</sub>O-N)

25 N<sub>2</sub>O-N emissions from organic manure management were calculated from experimental data collected at the AFBI Hillsborough Farm (AgriSearch, 2009) as well as default values (i.e. IPCC). N<sub>2</sub>O emissions were estimated for livestock and manure management including Direct and Indirect Emissions. We assumed cattle

stocking rates of 2 (i.e. 2 animal units per hectare), thus the total below is multiplied by 2 in our final GWP calculations

|                                                                            | Nitrous Oxide Emissions<br>(kg N <sub>2</sub> O m <sup>-2</sup> y <sup>-1</sup> ) | CO <sub>2</sub> equivalent<br>(g CO <sub>2</sub> -eq m <sup>-2</sup> y <sup>-1</sup> ) |    |
|----------------------------------------------------------------------------|-----------------------------------------------------------------------------------|----------------------------------------------------------------------------------------|----|
| Livestock and manure management                                            | 0.09                                                                              | 7.5                                                                                    |    |
| <b>Direct emissions</b>                                                    |                                                                                   |                                                                                        |    |
| Dung and urine deposited by cattle                                         | 0.95                                                                              | 79.12                                                                                  |    |
| Slurry spreading                                                           | 0.47                                                                              | 39.14                                                                                  |    |
|                                                                            |                                                                                   |                                                                                        | 10 |
| <b>Indirect emissions</b>                                                  |                                                                                   |                                                                                        |    |
| Volatilization from slurry spreading,<br>dung and urine by grazing animals | 0.19                                                                              | 15.82                                                                                  |    |
| Leaching losses                                                            | 0.28                                                                              | 23.32                                                                                  |    |
| <b>Total</b>                                                               | 1.98                                                                              | 164.9                                                                                  | 15 |

N<sub>2</sub>O emissions were converted to CO<sub>2</sub> equivalents using the following equation:

$$\text{EQ5: } Y \text{ g CO}_2 \cdot \text{m} \cdot \text{y} = x \text{ g NO} - \text{Nha} \cdot \text{d} \times 44 \text{ g NO} / 28 \text{ g NO} - \text{N} \times 365 \text{ d} / 1 \text{ ha} \times 10 \text{ m} \times 265 \text{ g CO}_2 / \text{g NO}$$

## 20 6) CO<sub>2</sub>-eq emissions from managed soils (N<sub>2</sub>O-N)

To estimate N<sub>2</sub>O emissions from our managed grassland soils we used the default value of 1% set by (De Klein et al., 2006) and applied this conversion factor to the amount of N that is applied to our experimental plots every year either through organic (cattle slurry) or inorganic (NPK) nutrient applications (see Table below).

| Nutrient treatments | Total N applied<br>(Kg ha <sup>-1</sup> yr <sup>-1</sup> ) | N <sub>2</sub> O emissions<br>(g N <sub>2</sub> O ha <sup>-1</sup> yr <sup>-1</sup> ) | Total CO <sub>2</sub> -eq emissions<br>(g CO <sub>2</sub> m <sup>-2</sup> yr <sup>-1</sup> ) |
|---------------------|------------------------------------------------------------|---------------------------------------------------------------------------------------|----------------------------------------------------------------------------------------------|
| Control             | 0                                                          | 0                                                                                     | 0                                                                                            |
| NPK                 | 200                                                        | 2000                                                                                  | 83.3                                                                                         |
| Cattle (L)          | 162                                                        | 1620                                                                                  | 67.5                                                                                         |
| Cattle (M)          | 324                                                        | 3240                                                                                  | 134.9                                                                                        |
| Cattle (H)          | 648                                                        | 640                                                                                   | 269.8                                                                                        |

## 25

### 7) CO<sub>2</sub>-eq emissions from managed soils (CH<sub>4</sub>)

CH<sub>4</sub> emissions from cattle excrement in the field were estimated to be 1.7g CH<sub>4</sub> day<sup>-1</sup> for dairy cows and 1.6 g CH<sub>4</sub> day<sup>-1</sup> for non-dairy cattle (Jarvis et al., 1995).

## 30



8) *CO<sub>2</sub>eq emissions from milk yields*

The average C content of milk from a dairy cow was assumed to be 4%, while the average milk yield of the average Irish dairy cow was assumed to be 5000 L (5000 kg) (Jaksic et al., 2006). We assumed a livestock unit per hectare (LU ha<sup>-1</sup>) of 2. Emissions from milk yields in g CO<sub>2</sub> m<sup>-2</sup> yr<sup>-1</sup> were therefore calculated as:

$$Y \text{ g CO}_2 \text{ m}^{-2} \text{ yr}^{-1} = \text{LU ha}^{-1} \times 5000 \text{ kg} \times 0.0410 \times 4412$$

10

9) *CO<sub>2</sub>eq emissions from beef yields*

The average weight of an animal sent for slaughter was estimated to be 550 kg and the C content of the animal was assumed to be 5.1% (Byrne et al., 2006). Emissions were therefore calculated as:

$$Y \text{ g CO}_2 \text{ m}^{-2} \text{ yr}^{-1} = \text{Animals slaughtered as \% LU ha}^{-1} \times 550 \text{ kg} \times 0.05110 \times 4412$$

10) *Emissions from concentrate production and transportation*

We estimated the emission value associated with the production and transportation of each 1 kg of dry matter of concentrates as 0.74 kg CO<sub>2</sub>e for dairy cows, and 0.6170 kg CO<sub>2</sub>e for other cattle (Carbon Trust, 2010; The Scottish Government, 2011).

11) *CO<sub>2</sub>-eq from microbial oxidation*

The GWP associated with microbial oxidation of CH<sub>4</sub> was expressed as CO<sub>2</sub> using the following equation where microbial oxidation was estimated to be 2.5 g CH<sub>4</sub> ha<sup>-1</sup> day<sup>-1</sup> (see Fornara et al., 2011):

$$Y \text{ g CO}_2 \text{ m}^{-2} \text{ yr}^{-1} = y \text{ g CH}_4 \text{ ha}^{-1} \text{ day}^{-1} \times 16 \text{ g CH}_4 \text{ g CH}_4^{-1} \times 365 \text{ d yr}^{-1} \times 10 \text{ m}^2 \times 28 \text{ g CO}_2 \text{ g CH}_4^{-1}$$

12) *CO<sub>2</sub>-eq emissions from fertiliser production*

Literature data was used to estimate:

a) *CO<sub>2</sub> emission equivalents from the production of fertilisers*

- Urea: 1326.1 g CO<sub>2</sub> kg<sup>-1</sup> N (Kongshaug, 1998).
- Triple Superphosphate: 354 g CO<sub>2</sub> kg<sup>-1</sup> N P<sub>2</sub>O<sub>5</sub>. CO<sub>2</sub> emissions were calculated per kg of applied P (Kongshaug, 1998).
- Potassium: 111 g CO<sub>2</sub> kg<sup>-1</sup> K (Williams *et al.*, 2006) (This includes production and transport of fertiliser K).

The total GWP of CO<sub>2</sub> emissions from fertiliser production were calculated as follows, where 'EE' equates to the corresponding emission equivalent (see above): 'EE' equates to the corresponding emission equivalent (see above):

$$Y \text{ g CO}_2 \text{ m}^{-2} \text{ yr}^{-1} = \text{N kg ha yr}^{-1} \times \text{Urea EE}10000 +$$

$$\text{P kg ha yr}^{-1} \times \text{PO EE}10000 + \text{K kg ha yr}^{-1} \times \text{K EE}10000$$

*b) CO<sub>2</sub> emission equivalents from the transportation of fertilisers to the site of application.*

Estimations for transportation of N and P fertilisers were estimated using literature data assuming an average distribution distance of 160 km (Davis and Haglund, 1999; West and Marland, 2002).

- 5
- N fertilisers: 44 g CO<sub>2</sub> kg<sup>-1</sup> N
  - Triple superphosphate: 12 g CO<sub>2</sub> kg<sup>-1</sup> N P<sub>2</sub>O<sub>5</sub>

The total GWP of CO<sub>2</sub> emissions from fertiliser transportation was calculated using the following equations:

$$Y \text{ g CO}_2 \cdot \text{m} \cdot \text{y} = N \text{ kg ha yr} \times 44 \text{ g CO}_2 / 10000$$

10

$$Y \text{ g CO}_2 \cdot \text{m} \cdot \text{y} = P \text{ kg ha yr} \times 12 \text{ g CO}_2 / 10000$$

*13) CO<sub>2</sub> emissions from machinery use*

CO<sub>2</sub> emissions from machinery (diesel used by farm machinery during fertilisation, liming, silage cutting, baling etc.) were calculated as 24.9 g CO<sub>2</sub> m<sup>-2</sup> y<sup>-1</sup> (Downs and Hansen, 1998).

- 15
- This was calculated by multiplying the litres of fuel used per hectare (see Robertson et al., 2000). Estimated diesel consumption was 11.2 L ha<sup>-1</sup> based on current farming practices.

$$Y \text{ g CO}_2 \cdot \text{m} \cdot \text{y} = x \text{ L CH}_2 \text{ ha} \cdot \text{y} \times 832 \text{ g CH}_2 / \text{L CH}_2 \times 192 \text{ g C} / 226 \text{ g CH}_2 \times 44 \text{ g CO}_2 / \text{g C} \times 1 \text{ ha} / 10 \text{ m}$$

- 20
- where x = average annual diesel use (L·ha·yr)

## References

- AgriSearch: From beef production to consumption – a seminar for specialists. Department of Agriculture and Rural Development and Agri-Food and Biosciences Institute, 2009.
- Byrne, K. A., Kiely, G., Leahy, P.: Carbon sequestration determined using farm scale carbon balance and eddy covariance. *Agric. Ecosyst. Environ.* 121, 357–364, 2006.
- Carbon Trust: Guidelines for the Carbon Footprinting of Dairy Products in the UK. s.l.: Dairy UK & DairyCo, 2010, 2010.
- Casey, J., Holden, N. M.: Analysis of greenhouse gas emissions from the average Irish milk production system. *Agric. Syst.* 86, 97–114, 2005.
- 10 Davis, J., Haglund, C.: Life Cycle Inventory (LCI) of Fertiliser Production. Fertiliser Products Used in Sweden and Western Europe. Chalmers University of Technology, 1999.
- De Klein, C., Novoa, R. S. A., Ogle, S., Smith, K.A., Rochette, P., Wirth, T. C.: IPCC Guidelines for National Greenhouse Gas Inventories: Volume 4: Agriculture, Forestry and Other Land Use: Chapter 11: N<sub>2</sub>O Emissions from Managed Soils, and CO<sub>2</sub> Emissions from Lime and Urea Application, 2006.
- 15 Dong, H., Mangino, J., McAllister, T. A., Hatfield, J.L. et al.: IPCC Guidelines for National Greenhouse Gas Inventories; Volume 4: Agriculture, Forestry and Other Land Use; Chapter 10: Emissions from Livestock and Manure Management, 2006.
- Downs, H. W., Hansen, R. W.: Estimating farm fuel requirements. Fact Sheet No. 5.006. Colorado State University Extension. [www.ext.colostate.edu/pubs/farmmgt/05006.pdf](http://www.ext.colostate.edu/pubs/farmmgt/05006.pdf) Accessed February 2016, 1998.
- 20 Fornara, D. A., Steinbeiss, S., McNamara, N. et al.: Increases in soil organic carbon sequestration can reduce the global warming potential of long-term liming to permanent grassland. *Global Change Biol.* 17, 1925-1934, 2011.
- Jaksic, V., Kiely, G., Albertson, J., Oren, R., Katul, G., Leahy, P., Byrne, K. A.: Net ecosystem exchange of grasslands in contrasting wet and dry years. *Agric. For. Meteo.* 139, 323–334, 2006.
- 25 Jarvis, S.C., Lovell, R.D., Panayides, R.: Patterns of methane emission from excreta of grazing animals. *Soil Biol. Biochem.* 27, 1581–1588, 1995.
- Kongshaug, G.: Energy consumption and greenhouse gas emissions in fertiliser production. IFA Technical Conference pp. 18–18. Marrakech, 1998.
- Myhre, G., Shindell, D., Bréon, F.-M. et al.: Anthropogenic and Natural Radiative Forcing Supplementary Material. In: *Climate Change 2013: The Physical Science Basis. Contribution of Working Group I to the Fifth Assessment Report of the Intergovernmental Panel on Climate Change* [Stocker TF, Qin D, Plattner G-K, Tignor M, Allen SK., Boschung J, Nauels A, Xia Y, Bex V, Midgley PM (eds.)], 2013.
- Robertson, G., Paul, E., Harwood, R.: Greenhouse gases in intensive agriculture: contributions of individual gases to the radiative forcing of the atmosphere. *Science* 289, 1922–1925, 2000.
- 35 The Scottish Government: Scottish dairy supply chain greenhouse gas emissions. Methodology Report. s.l.: Scottish Government, 2011.
- West, T.O., Marland, G.: A synthesis of carbon sequestration, carbon emissions, and net carbon flux in agriculture: comparing tillage practices in the United States. *Agric. Ecosyst. Environ.* 91, 217–232, 2002.

West, T.O., McBride, A.C.: The contribution of agricultural lime to carbon dioxide emissions in the United States: dissolution, transport, and net emissions. *Agric. Ecosyst. Environ.* 108, 145–154, 2005.

Williams, A.G., Audsley, E., Sandars, D.L.: Energy and environmental burdens of organic and non-organic agriculture and horticulture. *What will organic farming deliver?* (ed C. Atkinson), pp. 19–24. Association of Applied Biologists, Wellesbourne, Warwick, 2006.

5

Yan, T., Woods, V. B., Morrison, S. J., Lively, F. O. et al.: Development of Tiers 2 and 3 methane emission factors for enteric fermentation and manure management of cattle and sheep using Hillsborough herd data and calorimetric methane measurements. *Adv. Anim. Biosci.* 1, 49–49, 2010.
